# Supplementary material for: The cost of typhoid illness in low- and middle-income countries, a scoping review of the literature
Source: PubMed Central journal article supplement (PMC11198801; doi:10.1371/journal.pone.0305692), 2024-06-25
Supplement: pone.0305692.s004.pdf [file pone.0305692.s004.pdf]

**Supplementary table 1: Articles included in the review**

| <b>Year of publication</b> | <b>Author</b>       | <b>Title</b>                                                                                                                                        | <b>Country</b>                             | <b>Reference</b> |
|----------------------------|---------------------|-----------------------------------------------------------------------------------------------------------------------------------------------------|--------------------------------------------|------------------|
| 2004                       | Balh et al.         | Costs of Illness Due to Typhoid Fever in an Indian Urban Slum Community: Implications for Vaccination Policy                                        | India                                      | [1]              |
| 2009                       | Sur et al.          | Treatment Cost for Typhoid Fever at Two Hospitals in Kolkata, India                                                                                 | India                                      | [2]              |
| 2011                       | Poulos et al.       | Cost of illness due to typhoid fever in five Asian countries                                                                                        | China, India, Indonesia, Pakistan, Vietnam | [3]              |
| 2014                       | Riewpaiboon et al.  | Cost of Illness Due to Typhoid Fever in Pemba, Zanzibar, East Africa                                                                                | Tanzania                                   | [4]              |
| 2017                       | Kaljee et al.       | Social and Economic Burden Associated With Typhoid Fever in Kathmandu and Surrounding Areas: A Qualitative Study                                    | Nepal                                      | [5]              |
| 2020                       | Mejia et al.        | Typhoid and Paratyphoid Cost of Illness in Bangladesh: Patient and Health Facility Costs From the Surveillance for Enteric Fever in Asia Project II | Bangladesh                                 | [6]              |
| 2020                       | Mejia et al.        | Typhoid and Paratyphoid Cost of Illness in Nepal: Patient and Health Facility Costs From the Surveillance for Enteric Fever in Asia Project II      | Nepal                                      | [7]              |
| 2020                       | Mejia et al.        | Typhoid and Paratyphoid Cost of Illness in Pakistan: Patient and Health Facility Costs From the Surveillance for Enteric Fever in Asia Project II   | Pakistan                                   | [8]              |
| 2020                       | Seyi-Olajide et al. | Catastrophic Healthcare Expenditure from Typhoid Perforation in Children in Nigeria                                                                 | Nigeria                                    | [9]              |
| 2020                       | Wabada et al.       | The Socio-Economic Impact of Typhoid Intestinal Perforation in Children in a Developing Country                                                     | Nigeria                                    | [10]             |
| 2021                       | Adamou H. Et al.    | The burden of typhoid perforation of the small intestine in Niger.                                                                                  | Niger                                      | [11]             |
| 2021                       | Kumar et al.        | Cost of Illness Due to Severe Enteric Fever in India.                                                                                               | India                                      | [12]             |
| 2022                       | Limani et al.       | Estimating the economic burden of typhoid in children and adults in Blantyre, Malawi: a costing cohort study                                        | Malawi                                     | [13]             |

- 
- <sup>1</sup> Rajiv Bahl, Anju Sinha, Christine Poulos, et al. Costs of Illness Due to Typhoid Fever in an Indian Urban Slum Community: Implications for Vaccination Policy. *J Health Popul Nutr.* 2004 Sep;22(3):304-310. <https://pubmed.ncbi.nlm.nih.gov/15609783/>
- <sup>2</sup> Dipika Sur, Susmita Chatterjee, Arthorn Riewpaiboon, et al. Treatment Cost for Typhoid Fever at Two Hospitals in Kolkata, India. *J Health Popul Nutr.* 2009 Dec;27(6):725-732. <https://doi.org/10.3329%2Fjhpn.v27i6.4323>
- <sup>3</sup> Christine Poulos, Arthorn Riewpaiboon, John F. Stewart, et al. Cost of illness due to typhoid fever in five Asian countries. *Trop Med Int Health.* 2011 Mar;16(3):314-23. <https://doi.org/10.1111/j.1365-3156.2010.02711.x>
- <sup>4</sup> Arthorn Riewpaiboon, Moritz Piatti, Benedikt Ley, et al. Cost of Illness Due to Typhoid Fever in Pemba, Zanzibar, East Africa. *J Health Popul Nutr.* 2014 Sep;32(3):377-385. <http://www.ncbi.nlm.nih.gov/pmc/articles/pmc4221443/>
- <sup>5</sup> Linda M. Kaljee, Alfred Pach, Denise Garrett, et al. Social and Economic Burden Associated With Typhoid Fever in Kathmandu and Surrounding Areas: A Qualitative Study. *J Infect Dis.* 2018 Nov 10;218(suppl\_4):S243-S249. <https://doi.org/10.1093/infdis/jix122>
- <sup>6</sup> Nelly Mejia, Sarah W. Pallas, Samir Saha, et al. Typhoid and Paratyphoid Cost of Illness in Bangladesh: Patient and Health Facility Costs From the Surveillance for Enteric Fever in Asia Project II. *Clin Infect Dis.* 2020 Dec 1;71(Suppl 3):S293-S305. <https://doi.org/10.1093/cid/ciaa1334>
- <sup>7</sup> Nelly Mejia, Taiwo Abimbola, Jason R. Andrews, et al. Typhoid and Paratyphoid Cost of Illness in Nepal: Patient and Health Facility Costs From the Surveillance for Enteric Fever in Asia Project II. *Clin Infect Dis.* 2020 Dec 1;71(Suppl 3):S306-S318. <https://doi.org/10.1093/cid/ciaa1335>
- <sup>8</sup> Nelly Mejia, Farah Qamar, Mohammad T. Yousafzai, et al. Typhoid and Paratyphoid Cost of Illness in Pakistan: Patient and Health Facility Costs From the Surveillance for Enteric Fever in Asia Project II. *Clin Infect Dis.* 2020 Dec 1;71(Suppl 3):S319-S335. <https://doi.org/10.1093/cid/ciaa1336>
- <sup>9</sup> Justina O. Seyi-Olajide, Jamie Anderson, Augustine O. Enivwaene, et al. Catastrophic Healthcare Expenditure from Typhoid Perforation in Children in Nigeria. *Surg Infect (Larchmt).* 2020 Sep;21(7):586-591. <https://doi.org/10.1089/sur.2020.134>
- <sup>10</sup> Samuel Wabada, Auwal Mohammed Abubakar. The Socio-Economic Impact of Typhoid Intestinal Perforation in Children in a Developing Country. *Arch Pediatr* 5: 174. DOI: 10.29011/2575-825X.100174.
- <sup>11</sup> Adamou H, Amadou Magagi I, Adakal O, et al. The burden of typhoid perforation of the small intestine in Niger. *Journal Sahélien des Sciences de la Santé – Vol. 001, N°2.*
- <sup>12</sup> Dilesh Kumar, Atul Sharma, Saroj Kumar Rana, et al. Cost of Illness Due to Severe Enteric Fever in India. *J Infect Dis.* 2021 Nov 15; 224(Suppl 5): S540–S547. <https://doi.org/10.1093%2Finfdis%2Fjiab282>
- <sup>13</sup> Fumbani Limani, Christopher Smith, Richard Wachepa, et al. Estimating the economic burden of typhoid in children and adults in Blantyre, Malawi: A costing cohort study. *PLoS One.* 2022 Nov 23;17(11):e0277419. <https://doi.org/10.1371/journal.pone.0277419>
